# Supplementary material for: Differential transcriptome analysis of glandular and filamentous trichomes in Artemisia annua
Source: PubMed Central journal article supplement (PMC3878173; doi:10.1186/1471-2229-13-220), 2013-12-20
Supplement: 1471-2229-13-220-S3.pdf [file 1471-2229-13-220-S3.pdf]

## Overview of primer sequences used for qRT-PCR.

| Transcripts                | Primer sequences                        |                                         |
|----------------------------|-----------------------------------------|-----------------------------------------|
| <i>Actin 2</i>             | TCAGGCCGTGCTTTCTCTTT                    | AGATGGGCACTGTATGGGAC                    |
| <i>PP2AA3</i>              | TACCATATACCGCACACGCC                    | GGGAAGTTGTTACAGCCCCA                    |
| <i>PPR</i>                 | GGGAAACTTAAGGTTGCGGT                    | ACCATCCCAGAGTACCCAT                     |
| <i>FDS</i>                 | CCCGAGGTGATTGGAAAGATTG <sup>[1]</sup>   | CGAATACAGCCTGAAGATTGAGAG <sup>[1]</sup> |
| <i>CYP71AV1</i>            | CGAGACTTTAACTGGTGAGATTGT <sup>[2]</sup> | CGAAGCGACTGAAATGACTTTACT <sup>[2]</sup> |
| <i>DBR2</i>                | ATGGAAGTGAGGAGGAAG <sup>[1]</sup>       | AAACAAGGTCAGGATTCTG <sup>[1]</sup>      |
| <i>Aldh1</i>               | TCGGAGTAGTTGGTCACATC <sup>[1]</sup>     | TCACGCCATCAGGAACAC <sup>[1]</sup>       |
| <i>P450 comp69</i>         | CTATTGCGCTTTGGGTCACG                    | GTAATCGAGGGCGGTTAGCA                    |
| <i>P450 comp2774</i>       | TTTGATTGGGGGTTGCCAGA                    | CATGGTTAACCCCGGCAAAA                    |
| <i>P450 comp 15043</i>     | TTGTGGACTTGTGTTGTGGCG                   | GTGTGCGGGTTGCGTAGAA                     |
| <i>P450 comp 3673</i>      | AGCGAGGATCACGTTGCATT                    | GCGGTCACCACATGAGGATT                    |
| <i>P450 comp 548</i>       | GCACTCCAAGAGTTGCGGAT                    | AGTAATCCCAGCGCTTTCAG                    |
| <i>Per comp2084</i>        | TTCGTACAGGGCTGTGATGG                    | TGGGTGCGTTCCTTTCTCCT                    |
| <i>Per comp252</i>         | CAGGTCAGACCAGCAGTTGT                    | CCGCGAAATCCTCATGGAAAC                   |
| <i>Per comp6217</i>        | TTCTAGTCGACCGTGAGGGA                    | TTCTCGATGCTGAGTGGACTG                   |
| <i>Diox comp225</i>        | AGGAGAAGCGGTGCAAGATT                    | AACTGCCCTCCACTCTTTGG                    |
| <i>Diox comp453</i>        | GGTGGCGAAGACTTGGTCTA                    | CATGTCGGTATGTGGGGCTA                    |
| <i>TFAR1</i>               | CAAACCCTTTTCAGTTCACCA <sup>[1]</sup>    | ATGACAGCCTTTCCATCCTTT <sup>[1]</sup>    |
| <i>U_ OSC</i>              | CGGTCGAGCGTCAAGAAGTA                    | CGCATAAGCAAATCACCGCA                    |
| <i>epi-cedrol synthase</i> | TTGGTTCCATAAGGGCGAG                     | CGTAGGCTTGTTGCTCGCTA                    |

### References

1. Maes L, Van Nieuwerburgh FCW, Zhang YS, Reed DW, Pollier J, Castele S, Inze D, Covello PS, Deforce DLD, Goossens A: **Dissection of the phytohormonal regulation of trichome formation and biosynthesis of the antimalarial compound artemisinin in *Artemisia annua* plants.** *New Phytologist* 2011, **189**(1):176-189.
2. Olofsson L, Lundgren A, Brodelius PE: **Trichome isolation with and without fixation using laser microdissection and pressure catapulting followed by RNA amplification: Expression of genes of terpene metabolism in apical and sub-apical trichome cells of *Artemisia annua* L.** *Plant Science* 2012, **183**:9-13.
