# Supplementary material for: Differential transcriptome analysis of glandular and filamentous trichomes in Artemisia annua
Source: PubMed Central journal article supplement (PMC3878173; doi:10.1186/1471-2229-13-220), 2013-12-20

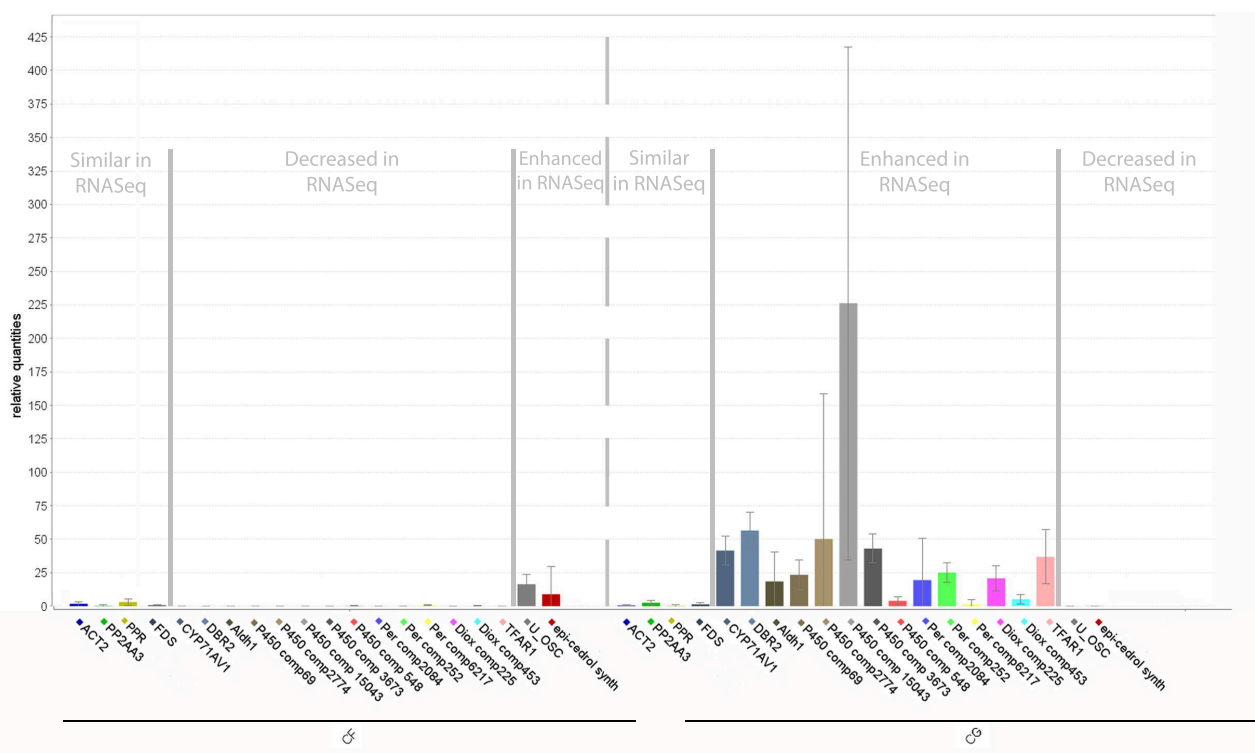

Supplement: 1471-2229-13-220-S9.pdf [file 1471-2229-13-220-S9.pdf]
